# Supplementary material for: Designing rGO/MoS2hybrid nanostructures for photocatalytic applications
Source: Royal Society of Chemistry journal article supplement (doi:10.1039/c6ra08633k), 2016-01-01
Supplement: c6ra08633k1.pdf [file c6ra08633k1.pdf]

## Designing rGO/MoS<sub>2</sub> hybrid nanostructures for photocatalytic applications

Sara Cravanzola, Federico Cesano\*, Giuliana Magnacca, Adriano Zecchina, Domenica Scarano

*Department of Chemistry, NIS (Nanostructured Interfaces and Surfaces) Interdepartmental Centre and  
INSTM Centro di Riferimento, University of Torino, Via P. Giuria, 7, 10125 Torino, Italy.*

\*E-mail: federico.cesano@unito.it

### Electronic Supplementary Information (ESI)

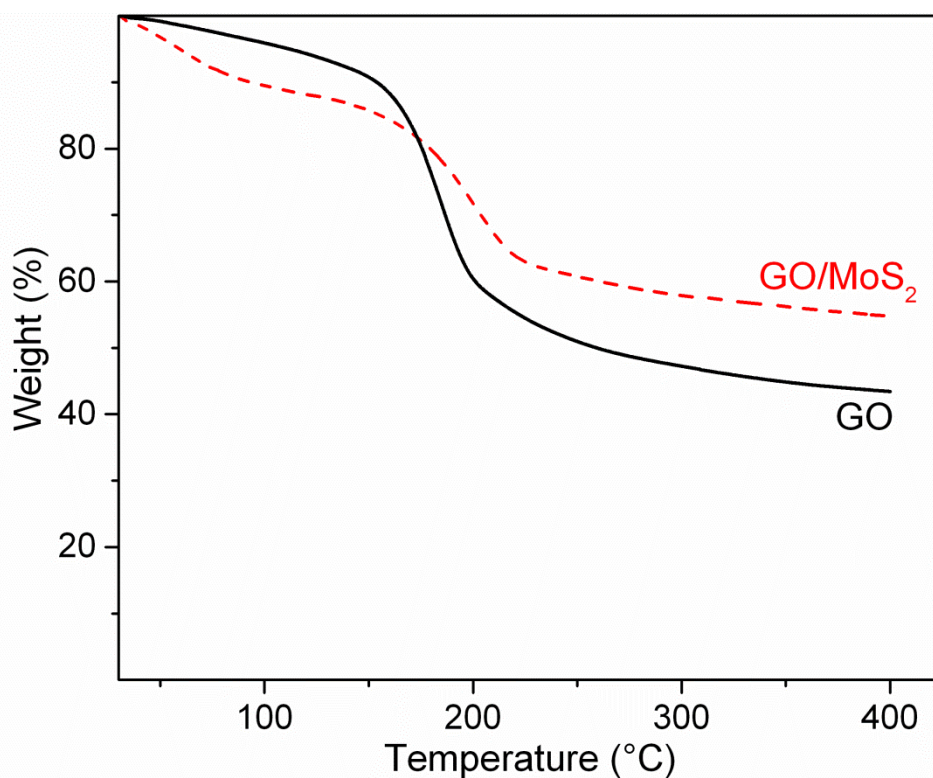

**Fig. S1.** TGA curve of GO and of GO/MoS<sub>2</sub> under N<sub>2</sub> atmosphere, 5°C/min up to 400°C.

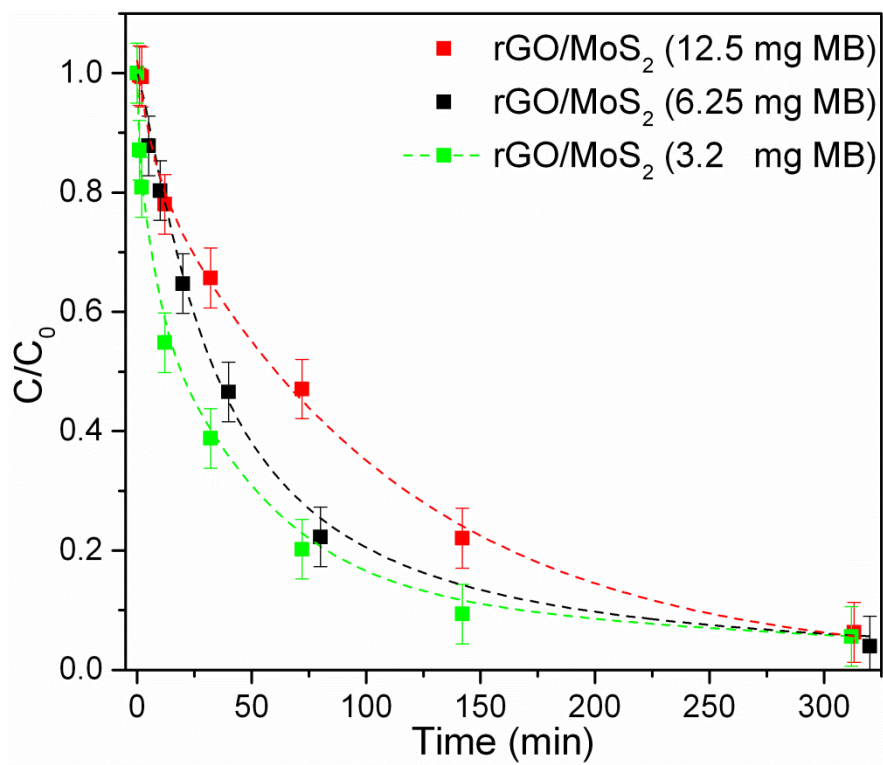

**Fig. S2.** Time dependence upon light exposure of MB adsorbed on rGO/MoS<sub>2</sub> for the three different initial concentrations of MB: 12.5 mgL<sup>-1</sup>, 6.25 mgL<sup>-1</sup> and 3.2 mgL<sup>-1</sup>.
